# Supplementary material for: Quantitative trait loci controlling Phytophthora cactorum resistance in the cultivated octoploid strawberry (Fragaria × ananassa)
Source: PubMed Central journal article supplement (PMC6491645; doi:10.1038/s41438-019-0136-4), 2019-05-01

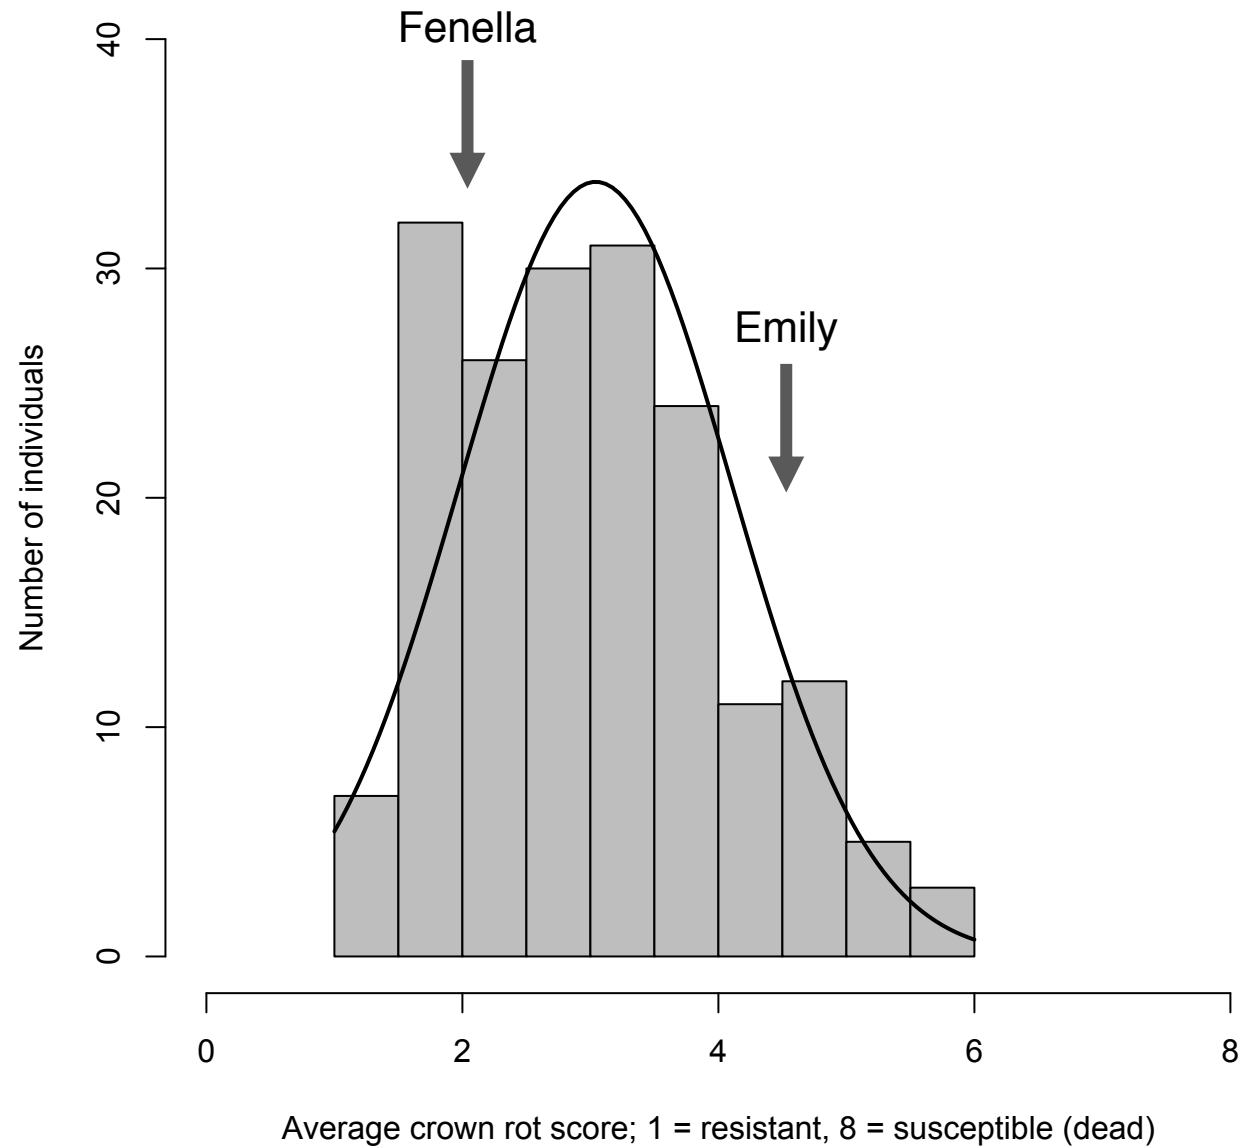

Supplement: 41438_2019_136_MOESM2_ESM.pdf [file 41438_2019_136_MOESM2_ESM.pdf]
